# Supplementary material
Source: MDPI journal article supplement (https://www.mdpi.com/2571-6131/1/2/28)

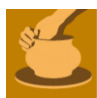

# Fabricating MOF/polymer composites via freeze casting for water remediation

Coral Rogers <sup>1</sup>, Daniel Pun <sup>1</sup>, Qingshan Fu <sup>2</sup>, Haifei Zhang <sup>1,\*</sup>

<sup>1</sup> Department of Chemistry, University of Liverpool, Oxford Street, Liverpool, L69 7ZD, United Kingdom;

<sup>2</sup> College of Material Science and Engineering, Sichuan University of Science and Engineering, Zigong 643000, China

\* Correspondence: zhanghf@liverpool.ac.uk; Tel.: +44-151-7943545.

**Table S1.** Description of chitosan/UiO-66 samples prepared and tested.

| Sample Name                  | Sample Description                                                                                                                                                |
|------------------------------|-------------------------------------------------------------------------------------------------------------------------------------------------------------------|
| CM/UiO-66-1                  | Chitosan ( <b>medium</b> molecular weight) with UiO-66 nanoparticles with the weight ration of chitosan:UiO-66 = <b>1:1</b>                                       |
| CM/UiO-66-2                  | Chitosan ( <b>medium</b> molecular weight) with UiO-66 nanoparticles with the weight ration of chitosan:UiO-66 = <b>1:2</b>                                       |
| CH/UiO-66-1                  | Chitosan ( <b>high</b> molecular weight) with UiO-66 nanoparticles with the weight ration of chitosan:UiO-66 = <b>1:1</b>                                         |
| CM/UiO-66-NO <sub>2</sub> -1 | Chitosan ( <b>medium</b> molecular weight) with <b>UiO-66-NO<sub>2</sub></b> nanoparticles with the weight ration of chitosan:UiO-66-NO <sub>2</sub> = <b>1:1</b> |
| CM/UiO-66-NH <sub>2</sub> -1 | Chitosan ( <b>medium</b> molecular weight) with <b>UiO-66-NH<sub>2</sub></b> nanoparticles with the weight ration of chitosan:UiO-66-NH <sub>2</sub> = <b>1:1</b> |
| CM/UiO-66-1 (HT)             | This sample is heat treated ( <b>HT</b> ) in a vacuum oven at 90 °C for 24 h.                                                                                     |
| CM/UiO-66-1 (BT)             | This sample is base treated ( <b>BT</b> ) by immersing in 1M NaOH solution for 15 min.                                                                            |
| CM/UiO-66-1 (GA)             | This sample is chemically crosslinked with glutaraldehyde ( <b>GA</b> ).                                                                                          |

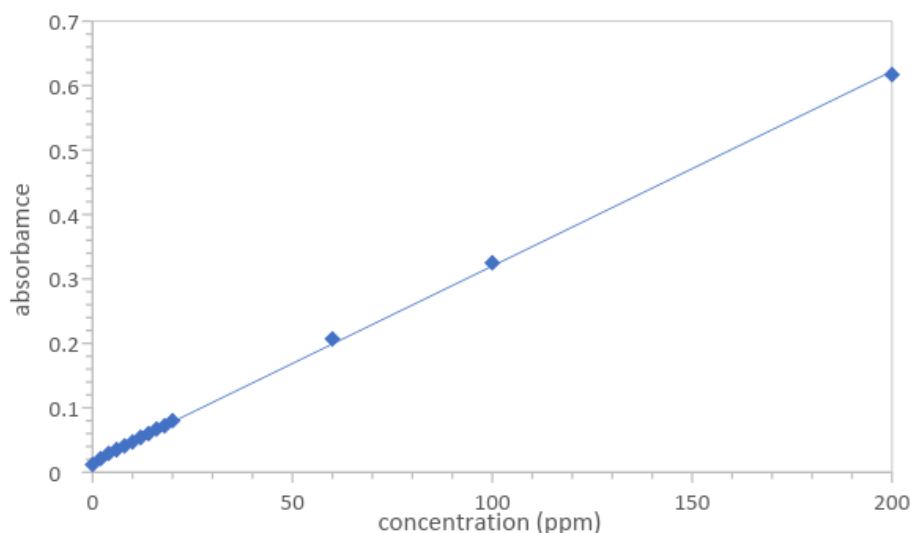

**Figure S1.** The calibration curve used to calculate the MCP solution concentration.

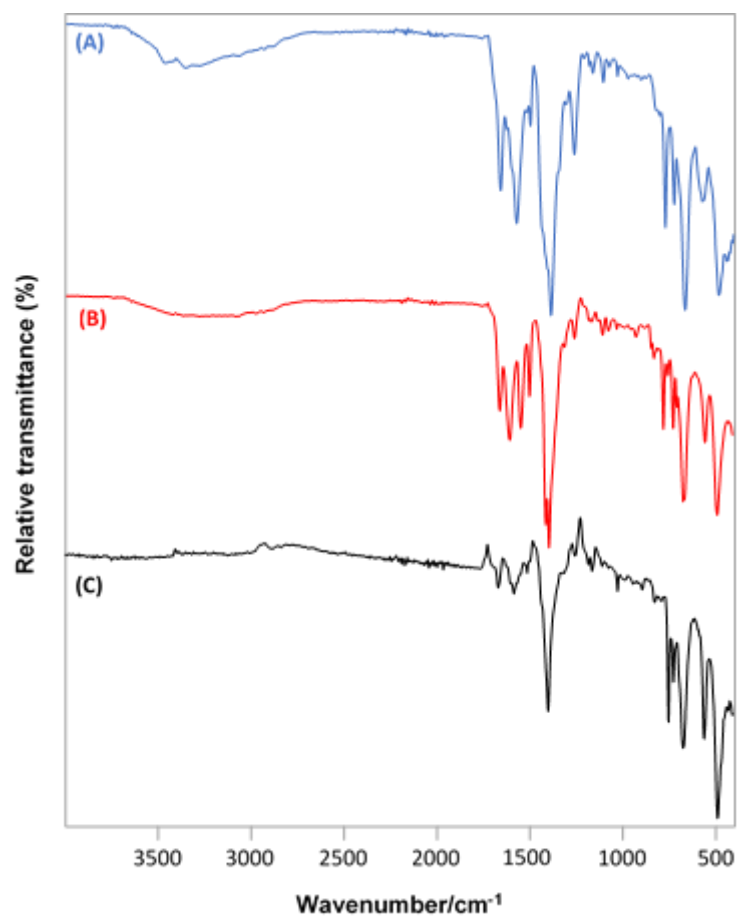

**Figure S2.** FTIR spectra of the MOF nanoparticles (A) UiO-66-NH<sub>2</sub>, (B) UiO-66-NO<sub>2</sub>, and (C) UiO-66.

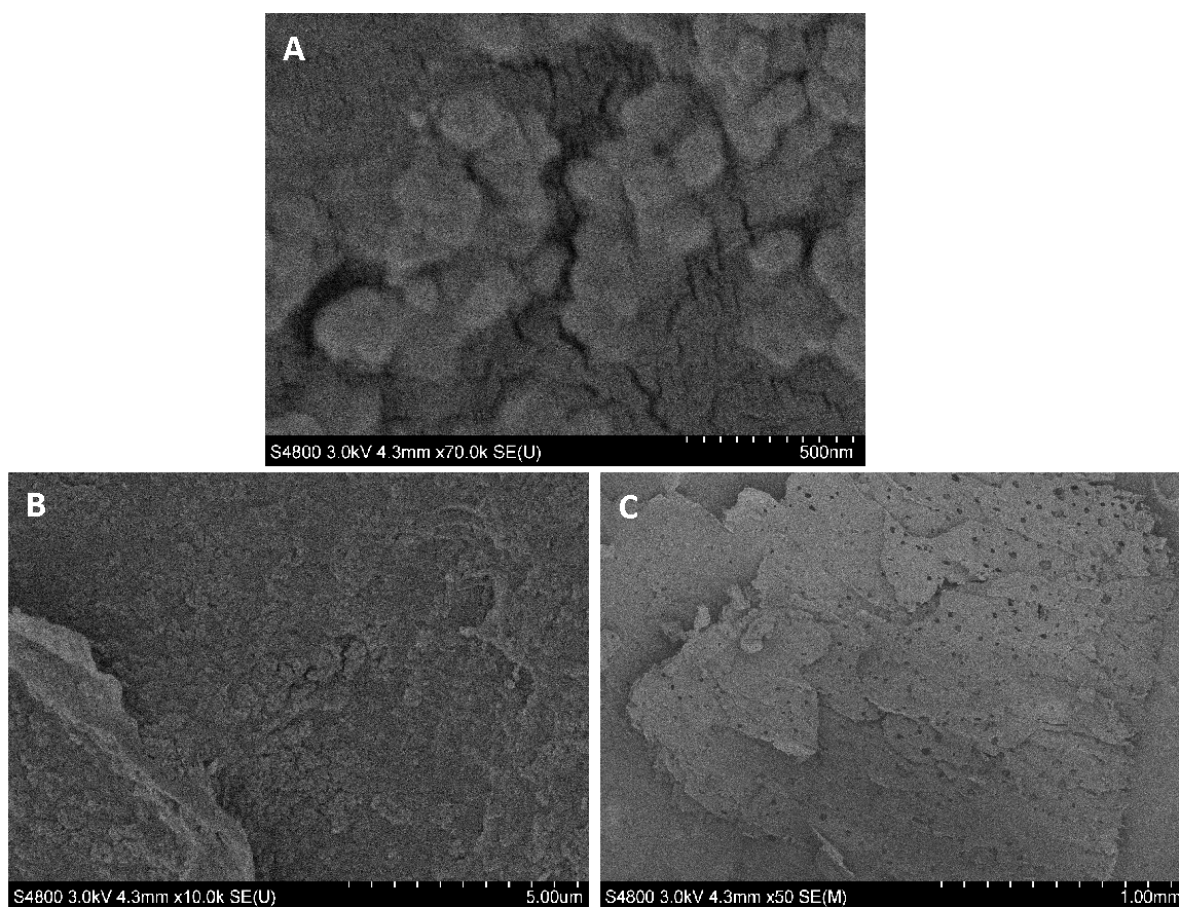

**Figure S3.** SEM images of chitosan (medium molecular weight)/UiO-66 composites at different magnifications. The UiO-66 nanoparticles (A,B) can be clearly seen. An ice-templated layered structure is also observed (C).

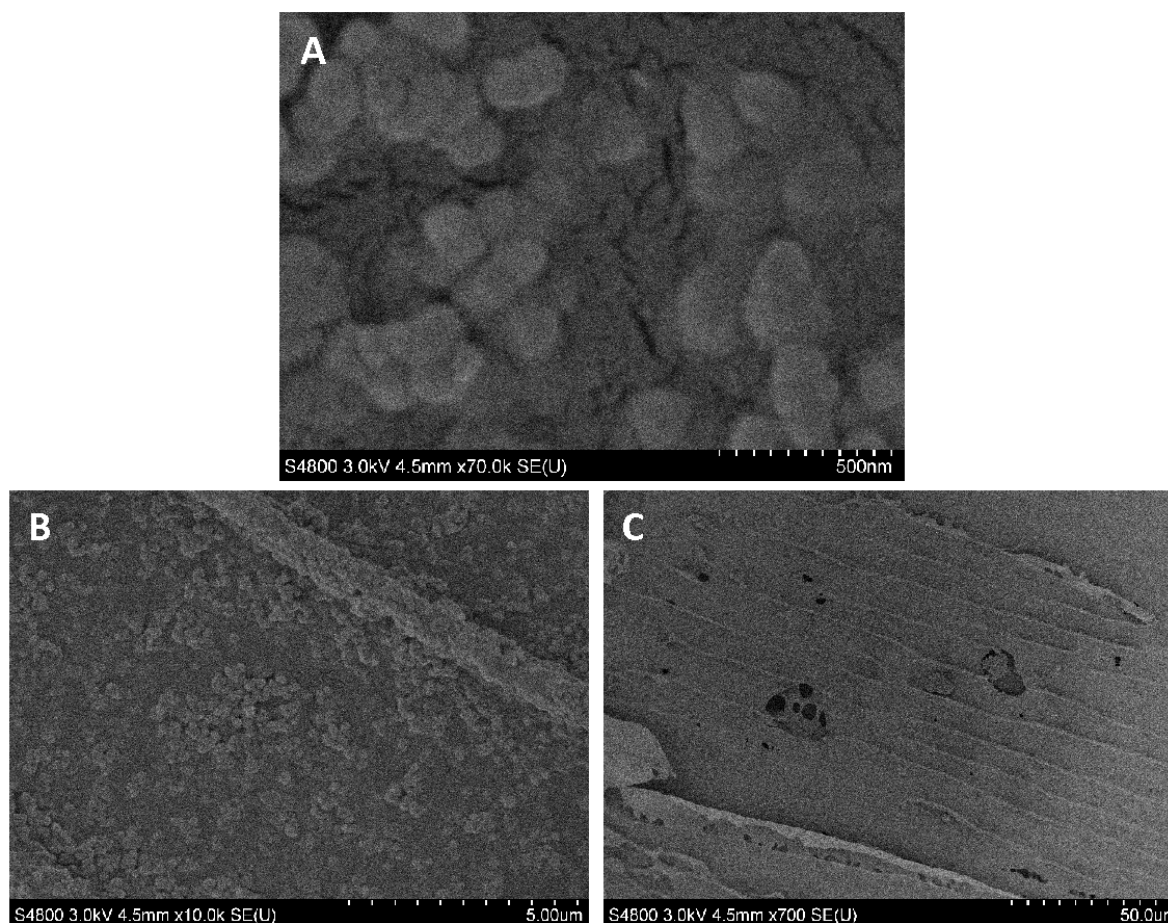

**Figure S4.** SEM images of chitosan (medium molecular weight)/UiO-66-NH<sub>2</sub> composites at different magnifications. The UiO-66-NH<sub>2</sub> nanoparticles (A,B) and the ice-templated structure (B,C) can be clearly seen.

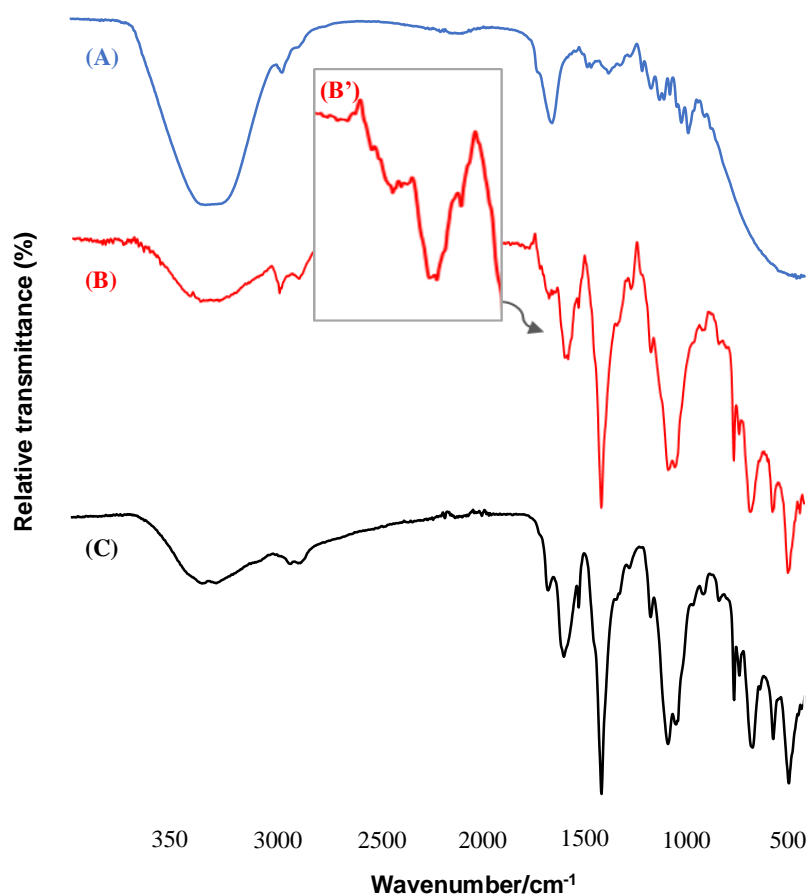

**Figure S5.** FTIR spectra confirm the crosslinking of chitosan by glutaraldehyde. (A) glutaraldehyde solution, (B) glutaraldehyde-crosslinked CM/UiO-66-1 monolith and (B') zoomed in section of B, (C) un-crosslinked CM/UiO-66-1 monolith.

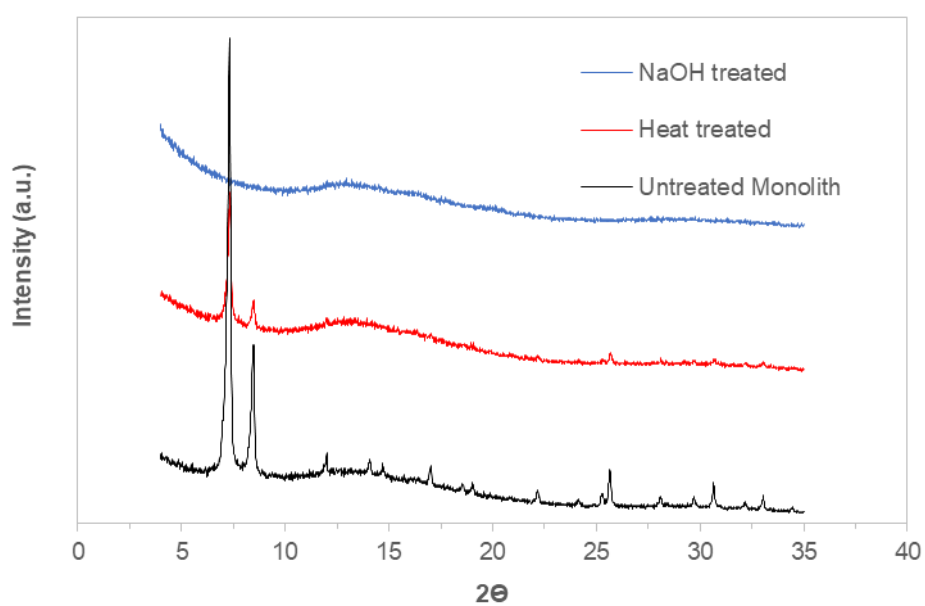

**Figure S6.** PXRD patterns of the chitosan (medium molecular weight)/UiO-66-NO<sub>2</sub> composite and after heat treatment and NaOH treatment, respectively.

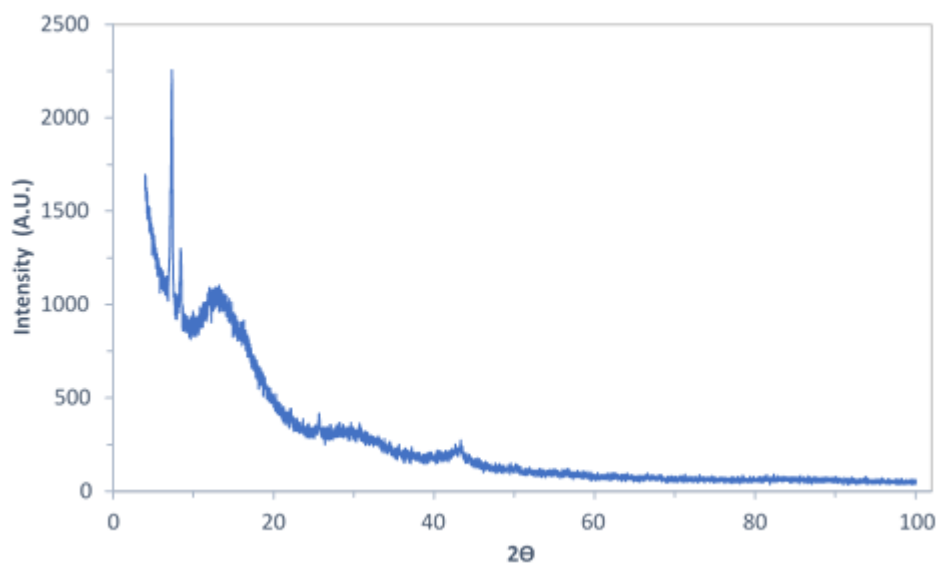

**Figure S7.** The PXRD patterns of the chitosan (medium molecular weight)/UiO-66-NH<sub>2</sub> composite.

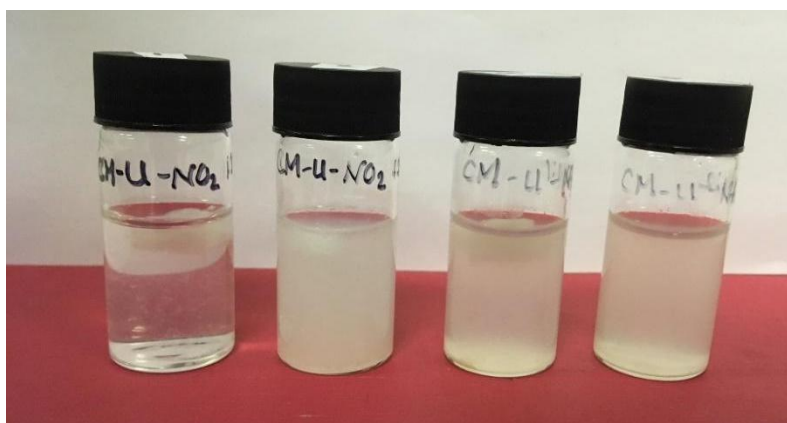

**Figure S8.** The photo shows the stability of the samples after adsorption testing; immersed in 10 mL of 60 ppm MCP solution for 3 h. From left to right: CM/UiO-66-NO<sub>2</sub>-1 (heat treated), untreated CM/UiO-66-NO<sub>2</sub>-1, CM/UiO-66-NH<sub>2</sub>-1 (heat treated), and untreated CM/UiO-66-NH<sub>2</sub>-1. After heat-treatment, the monoliths are still there, floating in the solution, whilst the untreated monoliths are completely disintegrated.

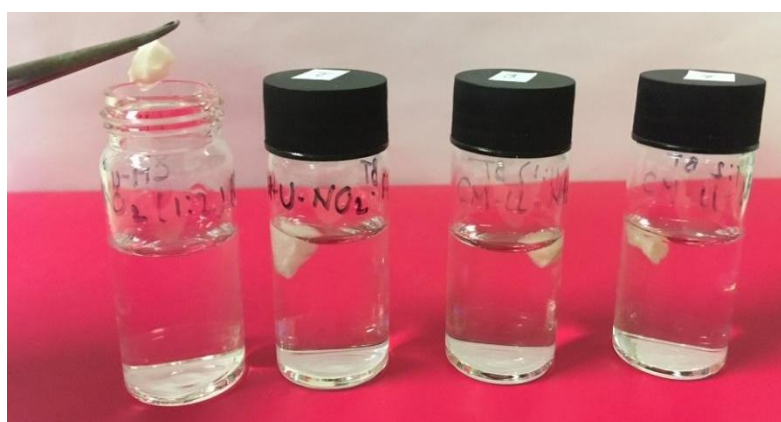

**Figure S9.** The photo shows the stability of the base-treated composite monoliths with UiO-66-NO<sub>2</sub> or UiO-66-NH<sub>2</sub> after adsorption testing; immersed in 10 mL of 60 ppm MCP solution for 6 h. From left to right: CM/UiO-66-NO<sub>2</sub>-2, CM/UiO-66-NO<sub>2</sub>-1, CM/UiO-66-NH<sub>2</sub>-2, CM/UiO-66-NH<sub>2</sub>-1.

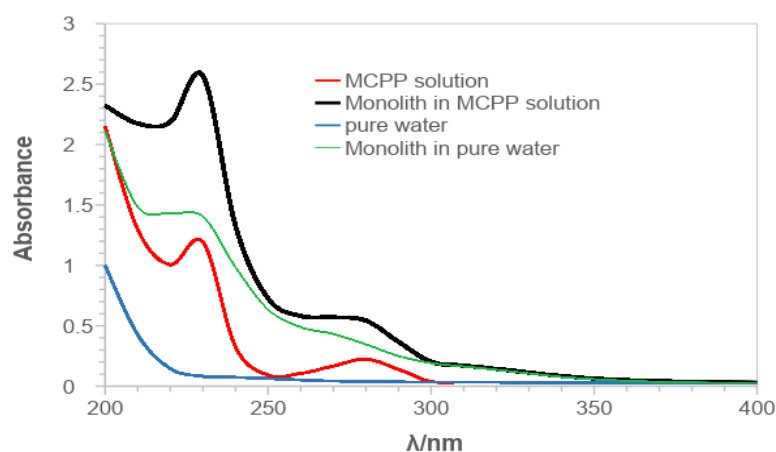

**Figure S10.** UV absorbance profile after the base-treated CM/UiO-66-NO<sub>2</sub> monolith is immersed for 2 h in MCPP solution and water.

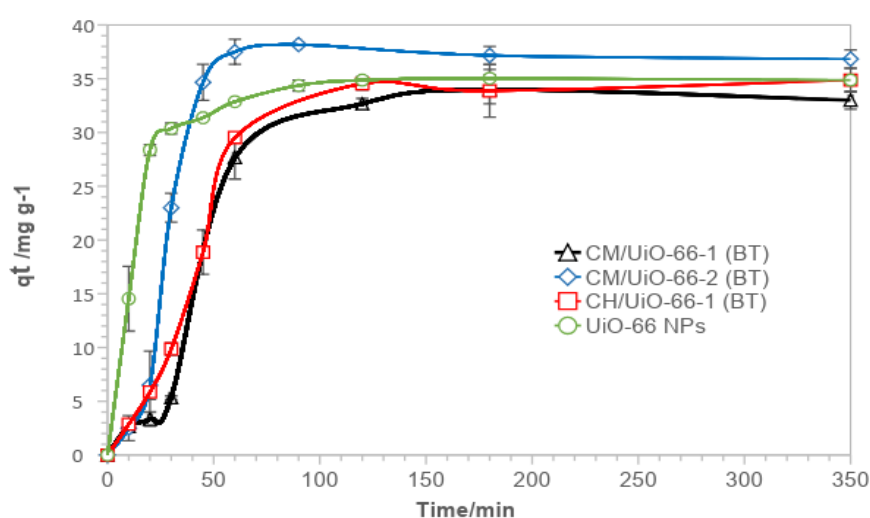

**Figure S11.** Profiles of the adsorbed quantity of MCPP versus soaking time by immersing the based-treated CM/UiO-66 composites (10 mg) or dispersing UiO-66 nanoparticles in 10 mL of aqueous solution of MCPP (60 ppm).

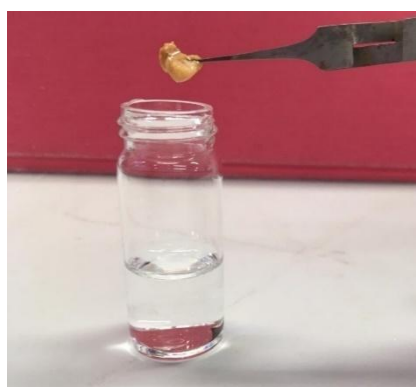

**Figure S12.** The photo shows the glutaraldehyde-crosslinked CM/UiO-66-1 monolith can be easily picked up after six hours immersed in MCPP solution.

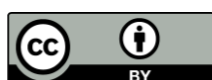

Supplement: s1 [file s1]
